# Supplementary material for: Sensor-Based Glucose Metrics during Different Diet Compositions in Type 1 Diabetes—A Randomized One-Week Crossover Trial
Source: MDPI journal article supplement (doi:10.3390/nu16020199), 2024-01-08
Supplement: s1 [file s1]

## Supplementary Materials

**Table S1.** Example of a high-carbohydrate diet plan.

|                                        | Amount         | Total<br>(g) | Energy<br>(Kcal) | Carbohydrates<br>(g) | Fat<br>(g) | Protein<br>(g) |
|----------------------------------------|----------------|--------------|------------------|----------------------|------------|----------------|
| <b>Breakfast</b>                       |                | <b>1405</b>  | <b>513</b>       | <b>76</b>            | <b>9</b>   | <b>25</b>      |
| Oats                                   | 3 dl           | 105          | 387              | 61                   | 7          | 14             |
| Skimmed milk (0.1%)                    | 3 dl           | 300          | 113              | 14                   | 2          | 11             |
| Coffee                                 | 5 cups (20 cl) | 1000         | 12               | 1                    | 0          | 1              |
| <b>Lunch</b>                           |                | <b>492</b>   | <b>774</b>       | <b>52</b>            | <b>46</b>  | <b>35</b>      |
| Salmon                                 |                | 110          | 195              | 0                    | 12         | 22             |
| Potatoes                               |                | 180          | 147              | 30                   | 1          | 3              |
| Rye bread (whole grain)                | 1 slice        | 45           | 91               | 17                   | 1          | 2              |
| Cooking oil                            | 2 tbsp         | 27           | 239              | 0                    | 27         | 0              |
| Vegetable garnish blend<br>(frozen)    |                | 100          | 26               | 4                    | 1          | 2              |
| Feta (40+)                             |                | 30           | 76               | 0                    | 6          | 6              |
| <b>Afternoon</b>                       |                | <b>170</b>   | <b>257</b>       | <b>39</b>            | <b>6</b>   | <b>8</b>       |
| Rye bread (whole grain)                | 1 slice        | 45           | 91               | 17                   | 1          | 2              |
| Cheese (hard, 45+)                     | 1 slice        | 20           | 67               | 0                    | 5          | 5              |
| Banana (medium size)                   | 1              | 105          | 99               | 22                   | 0          | 1              |
| <b>Dinner</b>                          |                | <b>875</b>   | <b>867</b>       | <b>55</b>            | <b>50</b>  | <b>46</b>      |
| Chicken (meat, raw)                    |                | 150          | 193              | 0                    | 8          | 29             |
| Potatoes                               |                | 180          | 147              | 30                   | 1          | 3              |
| Cooking oil                            | 2 tbsp         | 27           | 239              | 0                    | 27         | 0              |
| Vegetable garnish blend<br>(frozen)    |                | 100          | 26               | 4                    | 1          | 2              |
| Sun-dried tomatoes in<br>oil           | 3 pcs          | 18           | 38               | 3                    | 3          | 1              |
| Black olives (pitted, in<br>brine)     | 20 pcs         | 100          | 111              | 3                    | 10         | 1              |
| Skimmed milk (0.5%)                    | 3 dl           | 300          | 113              | 14                   | 2          | 11             |
| <b>Evening</b>                         |                | <b>230</b>   | <b>386</b>       | <b>40</b>            | <b>12</b>  | <b>26</b>      |
| Rye bread (whole grain)                | 2 slices       | 90           | 181              | 34                   | 1          | 5              |
| Cheese (hard, 45+)                     | 2 slices       | 40           | 133              | 1                    | 10         | 10             |
| Skyr (0.2%)                            |                | 100          | 71               | 6                    | 0          | 11             |
| <b>Total</b>                           |                | <b>3172</b>  | <b>2796</b>      | <b>262</b>           | <b>123</b> | <b>140</b>     |
| <b>180 g potatoes<br/>alternatives</b> |                | <b>852</b>   | <b>1183</b>      | <b>214</b>           | <b>8</b>   | <b>48</b>      |
| Pasta (fresh, boiled)                  |                | 112          | 147              | 28                   | 1          | 5              |
| Rice (boiled)                          |                | 112          | 146              | 32                   | 0          | 3              |
| Rye bread (whole grain)                |                | 75           | 153              | 29                   | 1          | 4              |
| Whole-grain bread                      |                | 68           | 148              | 36                   | 2          | 9              |
| Quinoa (boiled)                        |                | 90           | 146              | 23                   | 2          | 6              |
| Bulgur (boiled)                        |                | 180          | 149              | 25                   | 0          | 6              |
| Red lentils (boiled)                   |                | 100          | 148              | 23                   | 1          | 12             |
| Kidney beans (boiled)                  |                | 115          | 146              | 18                   | 1          | 10             |

**Table S2.** Example of a low-carbohydrate-high-fat diet plan.

|                                        | Amount         | Total<br>(g) | Energy<br>(Kcal) | Carbohydrates<br>(g) | Fat<br>(g) | Protein<br>(g) |
|----------------------------------------|----------------|--------------|------------------|----------------------|------------|----------------|
| <b>Breakfast</b>                       |                | <b>1261</b>  | <b>358</b>       | <b>18</b>            | <b>26</b>  | <b>12</b>      |
| Greek yogurt (10%)                     |                | 250          | 308              | 11                   | 25         | 10             |
| Oats                                   | 2 tbsp         | 11           | 39               | 6                    | 1          | 1              |
| Coffee                                 | 5 cups (20 cl) | 1000         | 12               | 1                    | 0          | 1              |
| <b>Lunch</b>                           |                | <b>422</b>   | <b>725</b>       | <b>20</b>            | <b>53</b>  | <b>44</b>      |
| Salmon                                 |                | 175          | 310              | 0                    | 19         | 35             |
| Potatoes                               |                | 90           | 74               | 15                   | 0          | 2              |
| Cooking oil                            | 2 tbsp         | 27           | 239              | 0                    | 27         | 0              |
| Vegetable garnish blend<br>(frozen)    |                | 100          | 26               | 4                    | 1          | 2              |
| Feta (40+)                             |                | 30           | 76               | 0                    | 6          | 6              |
| <b>Afternoon</b>                       |                | <b>130</b>   | <b>392</b>       | <b>18</b>            | <b>25</b>  | <b>22</b>      |
| Rye bread<br>(whole grain)             | 1 slice        | 45           | 91               | 17                   | 1          | 2              |
| Butter (salted)                        | 1 tsp          | 5            | 35               | 0                    | 4          | 0              |
| Cheese (hard, 45+)                     | 4 slices       | 80           | 267              | 1                    | 21         | 20             |
| <b>Dinner</b>                          |                | <b>600</b>   | <b>814</b>       | <b>30</b>            | <b>53</b>  | <b>51</b>      |
| Chicken (meat, raw)                    |                | 235          | 302              | 0                    | 13         | 45             |
| Potatoes                               |                | 120          | 98               | 20                   | 0          | 2              |
| Cooking oil                            | 2 tbsp         | 27           | 239              | 0                    | 27         | 0              |
| Vegetable garnish blend<br>(frozen)    |                | 100          | 26               | 4                    | 1          | 2              |
| Sun-dried tomatoes<br>in oil           | 3 pcs          | 18           | 38               | 3                    | 3          | 1              |
| Black olives<br>(pitted, in brine)     | 20 pcs         | 100          | 111              | 3                    | 10         | 1              |
| <b>Evening</b>                         |                | <b>370</b>   | <b>485</b>       | <b>14</b>            | <b>40</b>  | <b>16</b>      |
| Greek yogurt (10%)                     |                | 250          | 308              | 11                   | 25         | 10             |
| Cheese (hard, 45+)                     | 1 slice        | 20           | 67               | 0                    | 5          | 5              |
| Black olives<br>(pitted, in brine)     | 20 pcs         | 100          | 111              | 3                    | 10         | 1              |
| <b>Total</b>                           |                | <b>2782</b>  | <b>2774</b>      | <b>100</b>           | <b>197</b> | <b>145</b>     |
| <b>120 g potatoes<br/>alternatives</b> |                | <b>570</b>   | <b>792</b>       | <b>143</b>           | <b>5</b>   | <b>32</b>      |
| Pasta (fresh, boiled)                  |                | 75           | 98               | 19                   | 1          | 4              |
| Rice (boiled)                          |                | 75           | 98               | 21                   | 0          | 2              |
| Rye bread<br>(whole grain)             |                | 50           | 102              | 20                   | 1          | 3              |
| Whole-grain bread                      |                | 45           | 98               | 24                   | 1          | 2              |
| Quinoa (boiled)                        |                | 60           | 97               | 15                   | 2          | 4              |
| Bulgur (boiled)                        |                | 120          | 100              | 17                   | 0          | 4              |
| Red lentils (boiled)                   |                | 70           | 103              | 16                   | 1          | 8              |
| Kidney beans (boiled)                  |                | 75           | 95               | 12                   | 0          | 7              |

**Table S3.** Example of a low-carbohydrate-high-protein diet plan.

| Amount                              |                | Total<br>(g) | Energy<br>(Kcal) | Carbohydrates<br>(g) | Fat<br>(g) | Protein<br>(g) |
|-------------------------------------|----------------|--------------|------------------|----------------------|------------|----------------|
| <b>Breakfast</b>                    |                | <b>1295</b>  | <b>437</b>       | <b>27</b>            | <b>19</b>  | <b>35</b>      |
| Skyr (0.2%)                         |                | 200          | 131              | 9                    | 0          | 22             |
| Rye bread (whole grain)             | 1 slice        | 45           | 91               | 17                   | 1          | 2              |
| Butter (salted)                     | 2 tsp          | 10           | 69               | 0                    | 8          | 0              |
| Cheese (hard, 45+)                  | 2 slices       | 40           | 133              | 1                    | 10         | 10             |
| Coffee                              | 5 cups (20 cl) | 1000         | 12               | 1                    | 0          | 1              |
| <b>Lunch</b>                        |                | <b>497</b>   | <b>829</b>       | <b>25</b>            | <b>58</b>  | <b>53</b>      |
| Salmon                              |                | 220          | 390              | 0                    | 24         | 44             |
| Potatoes                            |                | 120          | 98               | 20                   | 0          | 2              |
| Cooking oil                         | 2 tsp          | 27           | 239              | 0                    | 27         | 0              |
| Vegetable garnish blend<br>(frozen) |                | 100          | 26               | 4                    | 1          | 2              |
| Feta (40+)                          |                | 30           | 76               | 0                    | 6          | 6              |
| <b>Afternoon</b>                    |                | <b>80</b>    | <b>267</b>       | <b>1</b>             | <b>21</b>  | <b>20</b>      |
| Cheese (hard, 45+)                  | 4 slices       | 80           | 267              | 1                    | 21         | 20             |
| <b>Dinner</b>                       |                | <b>665</b>   | <b>897</b>       | <b>30</b>            | <b>57</b>  | <b>64</b>      |
| Chicken (meat, raw)                 |                | 300          | 385              | 0                    | 17         | 58             |
| Potatoes                            |                | 120          | 98               | 20                   | 0          | 2              |
| Cooking oil                         | 2 tbsp         | 27           | 239              | 0                    | 27         | 0              |
| Vegetable garnish blend<br>(frozen) |                | 100          | 26               | 4                    | 1          | 2              |
| Sun-dried tomatoes in oil           | 3 pcs          | 18           | 38               | 3                    | 3          | 1              |
| Black olives<br>(pitted, in brine)  | 20 pcs         | 100          | 111              | 3                    | 10         | 1              |
| <b>Evening</b>                      |                | <b>340</b>   | <b>375</b>       | <b>12</b>            | <b>21</b>  | <b>33</b>      |
| Skyr (0.2%)                         |                | 200          | 131              | 9                    | 0          | 22             |
| Cheese (hard, 45+)                  | 2 slices       | 40           | 133              | 1                    | 10         | 10             |
| Black olives<br>(pitted, in brine)  | 20 pcs         | 100          | 111              | 3                    | 10         | 1              |
| <b>Total</b>                        |                | <b>2877</b>  | <b>2805</b>      | <b>95.7</b>          | <b>175</b> | <b>205</b>     |
| <b>120 g potatoes alternatives</b>  |                | <b>570</b>   | <b>792</b>       | <b>143</b>           | <b>5</b>   | <b>32</b>      |
| Pasta (fresh, boiled)               |                | 75           | 98               | 19                   | 1          | 4              |
| Rice (boiled)                       |                | 75           | 98               | 21                   | 0          | 2              |
| Rye bread (whole grain)             |                | 50           | 102              | 20                   | 1          | 3              |
| Whole-grain bread                   |                | 45           | 98               | 24                   | 1          | 2              |
| Quinoa (boiled)                     |                | 60           | 97               | 15                   | 2          | 4              |
| Bulgur (boiled)                     |                | 120          | 100              | 17                   | 0          | 4              |
| Red lentils (boiled)                |                | 70           | 103              | 16                   | 1          | 8              |
| Kidney beans (boiled)               |                | 75           | 95               | 12                   | 0          | 7              |

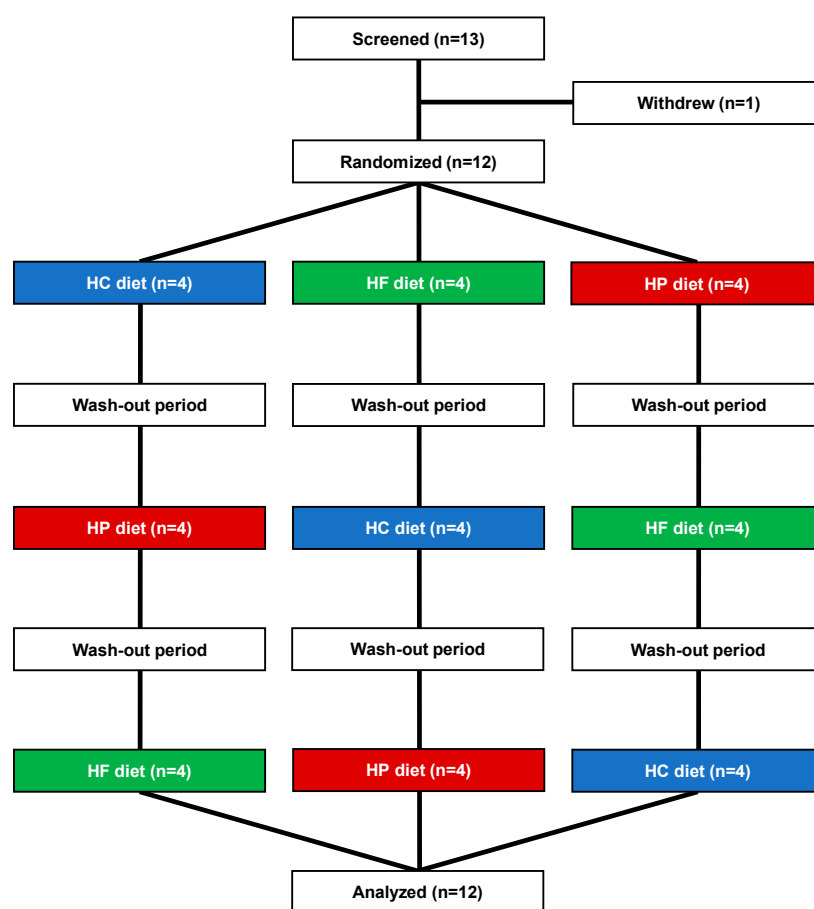

**Figure S1.** Flow diagram. HC, High-carbohydrate; HF, Low-carbohydrate-high-fat; HP, Low-carbohydrate-high-protein.
